# Supplementary material for: EfficientN-sulfopropylation of chitosan with 1,3-propane sultone in aqueous solutions: neutral pH as the key condition
Source: Royal Society of Chemistry journal article supplement (doi:10.1039/d1re00089f), 2021-01-01
Supplement: d1re00089f1.pdf [file d1re00089f1.pdf]

## Supplementary Information

### Efficient *N*-sulfopropylation of chitosan with 1,3-propane sultone in aqueous solutions: neutral pH as the key condition

Abolfazl Heydari,<sup>\*a</sup> Mahdiah Darroudi,<sup>b</sup> Igor Lacík<sup>\*a,c</sup>

<sup>a</sup>Polymer Institute of the Slovak Academy of Sciences, Dúbravská cesta 9, 845 41  
Bratislava, Slovakia

<sup>b</sup>Department of Energy Science and Technology, Faculty of Science, Turkish-German  
University, 106 34820 Istanbul, Turkey

<sup>c</sup>Centre for Advanced Materials Application of the Slovak Academy of Sciences,  
Dúbravská cesta 9, 845 11 Bratislava, Slovakia

\*Corresponding authors: [abolfazl.heydari@savba.sk](mailto:abolfazl.heydari@savba.sk), [igor.lacik@savba.sk](mailto:igor.lacik@savba.sk)

## Table of Contents

|                                                                                                                    |   |
|--------------------------------------------------------------------------------------------------------------------|---|
| EQUATIONS .....                                                                                                    | 3 |
| Eqs. S1 and S2. Determination of the degree of acetylation (DA) for chitosan (CS) .....                            | 3 |
| FIGURES .....                                                                                                      | 4 |
| Figure S1. $^{13}\text{C}$ NMR spectra of N-(3-sulfopropyl)chitosan salt (SPCS) purified by different methods..... | 4 |
| Figure S2. $^{13}\text{C}$ NMR spectra of 1,3-propane sultone in $\text{D}_2\text{O}$ .....                        | 5 |
| Figure S3. HMBC spectrum of N-(3-sulfopropyl)chitosan salt (SPCS).....                                             | 6 |
| Figure S4. $^{13}\text{C}$ NMR spectra of N-(3-sulfopropyl)chitosan salt (SPCS) containing sulfopropyl salt.....   | 7 |
| REFERENCES.....                                                                                                    | 8 |

## EQUATIONS

### Eqs. S1 and S2. Determination of the degree of acetylation (DA) for chitosan (CS)

Elemental analysis:

$$DA (\%) = \left( \frac{W_{(C/N)} - (C/N)_{GlcN}}{(C/N)_{GlcNAc} - (C/N)_{GlcN}} \right) \times 100 \quad \text{Eq. S1}$$

where  $W_{(C/N)}$  is carbon/nitrogen mass ratio obtained by elemental analysis,  $(C/N)_{GlcN}$  and  $(C/N)_{GlcNAc}$  are the carbon/nitrogen ratios of GlcN and GlcNAc, respectively, equal to 5.145 and 6.861.<sup>1</sup>

<sup>1</sup>H NMR method:

$$DA (\%) = \left( \frac{I_{CH_3}/3}{I_{H_{2-6}}/6} \right) \times 100 \quad \text{Eq. S2}$$

where  $I_{CH_3}$  and  $I_{H_{2-6}}$  are the integrals of the acetyl proton signal in GlcNAc and proton signals of H2-6 in GlcN and GlcNAc units, respectively.<sup>2</sup>

## FIGURES

**Figure S1.**  $^{13}\text{C}$  NMR spectra of N-(3-sulfopropyl)chitosan salt (SPCS) purified by different methods

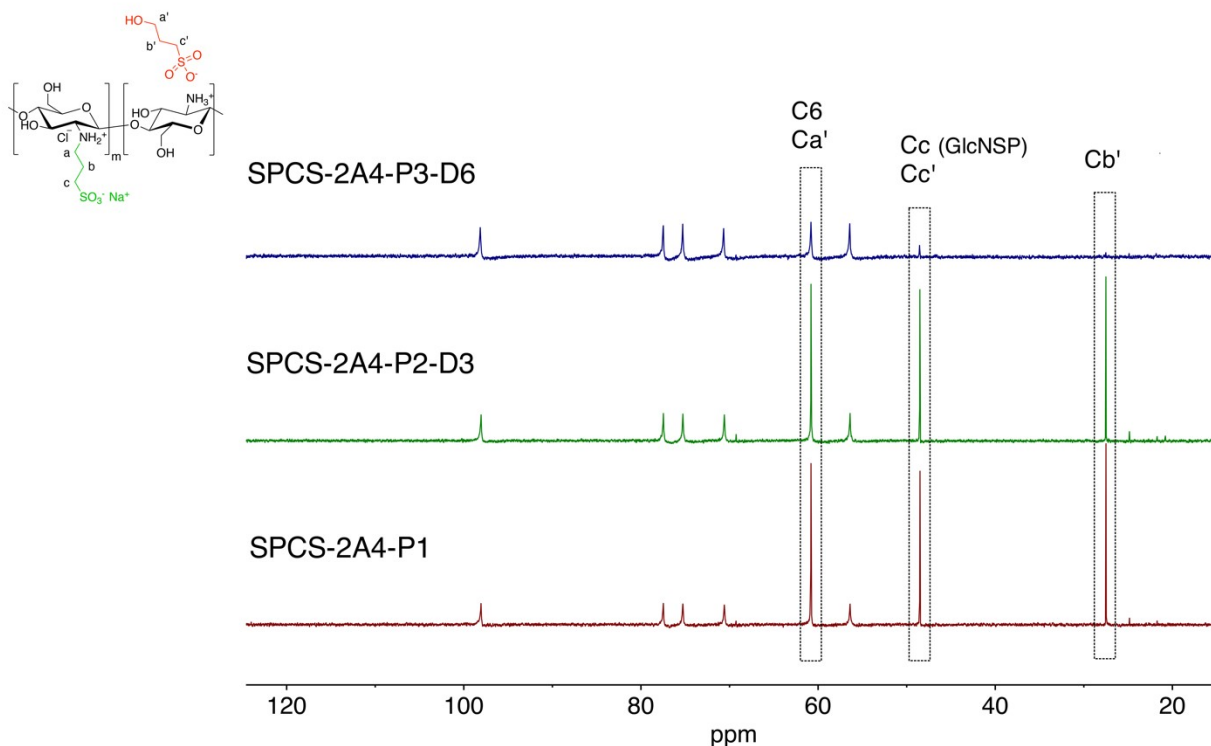

**Figure S1.**  $^{13}\text{C}$  NMR spectra of SPCS-2A4 in  $\text{D}_2\text{O}/\text{DCI}$  (100 MHz, pH  $\sim$  3.0, 65  $^\circ\text{C}$ ). SPCS was purified by precipitation (P1), dialysis against water at pH 6.5 (P2), and dialysis against water at pH 9 (P3). The representative carbon signals are labeled in the spectra.

**Figure S2.**  $^{13}\text{C}$  NMR spectra of 1,3-propane sultone in  $\text{D}_2\text{O}$

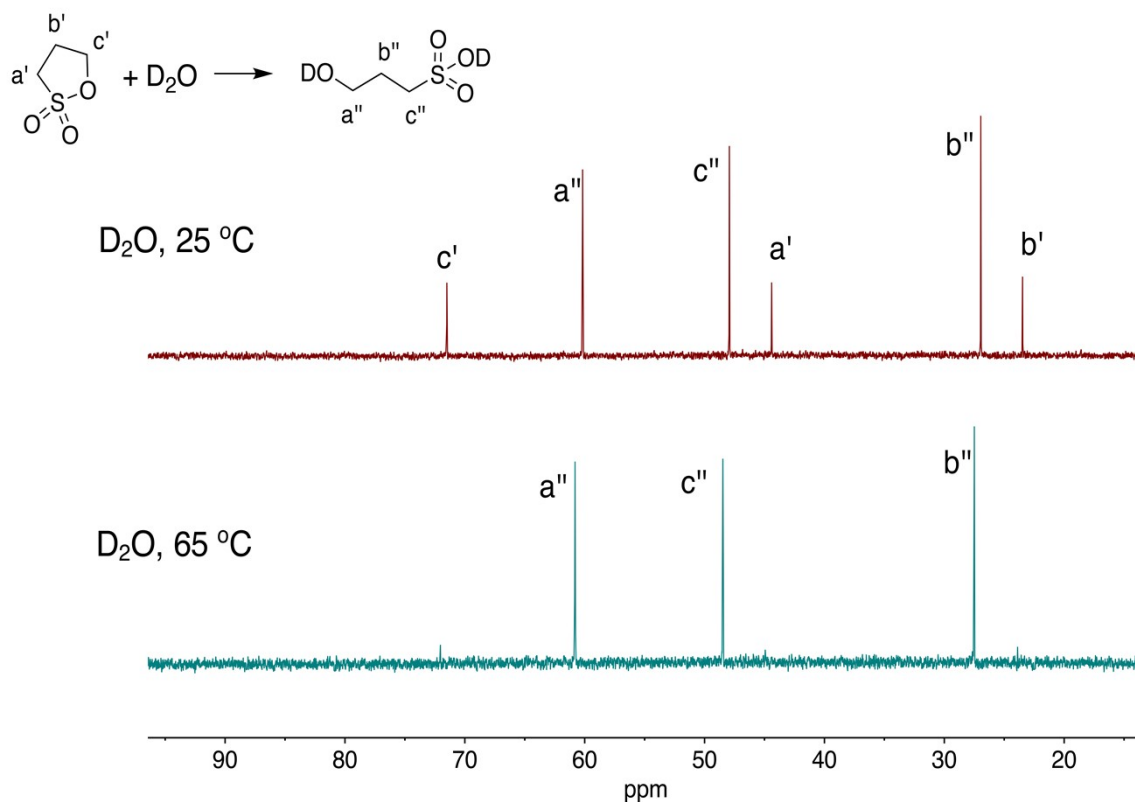

**Figure S2.**  $^{13}\text{C}$  NMR of PrS in  $\text{D}_2\text{O}$  (100 MHz) measured at 25 and 65  $^\circ\text{C}$ . PrS was dissolved around 2 h before performing NMR analysis and stored at ambient temperature. The spectra at 65  $^\circ\text{C}$  were measured after 30 min exposure of PrS to this temperature (by setting the acquisition time to 30 min).

**Figure S3. HMBC spectrum of N-(3-sulfopropyl)chitosan salt (SPCS)**

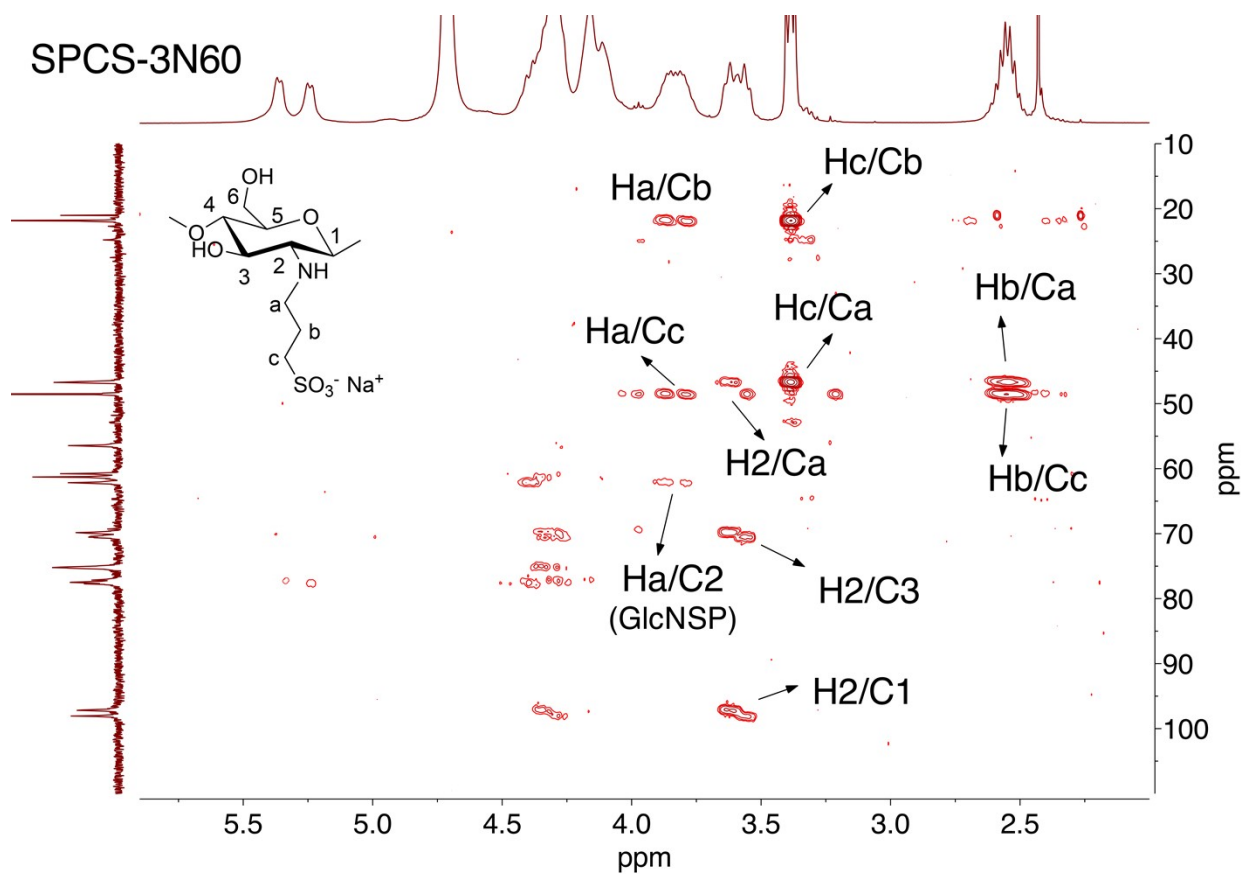

**Figure S3.**  $^1\text{H}$ - $^{13}\text{C}$  HMBC spectrum of SPCS-3N60 (400 MHz,  $\text{D}_2\text{O}/\text{DCl}$ ,  $\text{pH} \sim 3.0$ ,  $65^\circ\text{C}$ ). The representative cross peaks are labeled in the spectrum.

**Figure S4.**  $^{13}\text{C}$  NMR spectra of N-(3-sulfopropyl)chitosan salt (SPCS) containing sulfopropyl salt

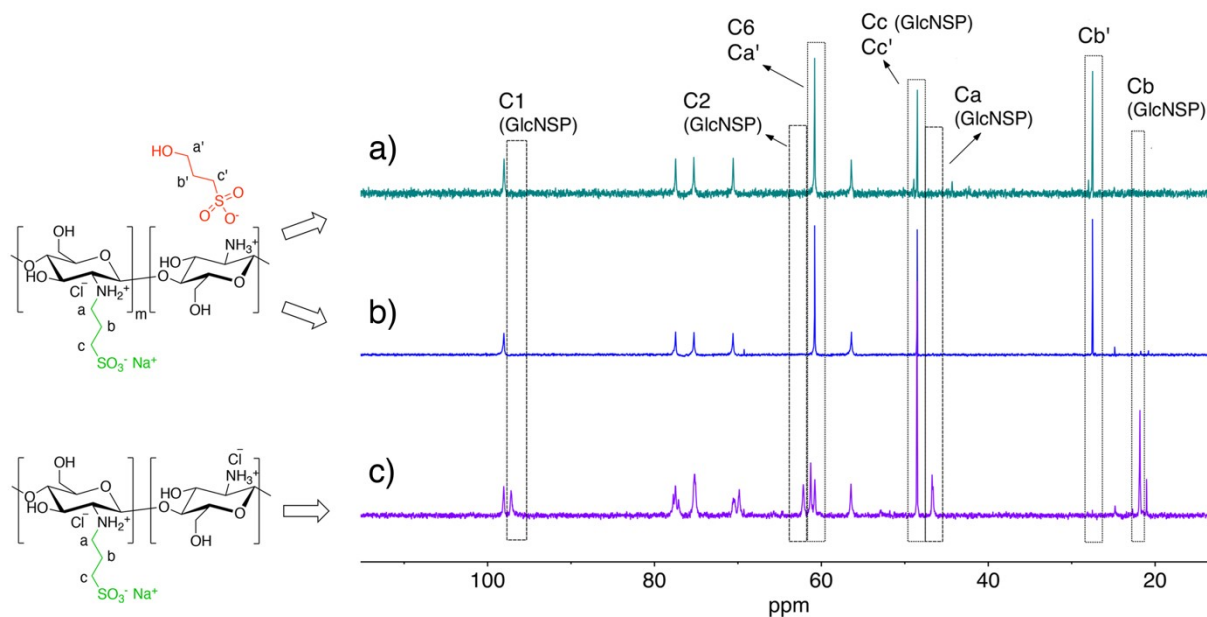

**Figure S4.**  $^{13}\text{C}$  NMR (100 MHz) (a) CS@PrS (weight ratio of 1 : 1) in  $\text{D}_2\text{O}$  after 30 min exposure of the solution to this temperature (by setting the acquisition time to 30 min), (b) SPCS-2A4@sulfopropyl salt in  $\text{D}_2\text{O}/\text{DCl}$ , and (c) SPCS-3N60 in  $\text{D}_2\text{O}/\text{DCl}$ .

## REFERENCES

1. Kasaai, M. R.; Arul, J.; Charlet, G., Intrinsic Viscosity-Molecular Weight Relationship for Chitosan. *J Polym Sci Pol Phys* **2000**, 38, (19), 2591-2598.
2. Hirai, A.; Odani, H.; Nakajima, A., Determination of degree of deacetylation of chitosan by <sup>1</sup>H NMR spectroscopy. *Polym Bull* **1991**, 26, (1), 87-94.
